# Supplementary material
Source: publisher figshare collection journal article supplement (https://acs.figshare.com/ndownloader/files/10120125)
Supplement: Supplementary file 1 [file 10120125]

 
data_7b'
 
_audit_creation_method            SHELXL-97
_chemical_name_systematic
;
 ?
;
_chemical_name_common             ?
_chemical_melting_point           ?
_chemical_absolute_configuration  syn
_chemical_formula_moiety          ?
_chemical_formula_sum
 'C21 H20 F N O4'
_chemical_formula_weight          369.38
 
 
loop_
 _atom_type_symbol
 _atom_type_description
 _atom_type_scat_dispersion_real
 _atom_type_scat_dispersion_imag
 _atom_type_scat_source
 'C'  'C'   0.0033   0.0016
 'International Tables Vol C Tables 4.2.6.8 and 6.1.1.4'
 'H'  'H'   0.0000   0.0000
 'International Tables Vol C Tables 4.2.6.8 and 6.1.1.4'
 'N'  'N'   0.0061   0.0033
 'International Tables Vol C Tables 4.2.6.8 and 6.1.1.4'
 'O'  'O'   0.0106   0.0060
 'International Tables Vol C Tables 4.2.6.8 and 6.1.1.4'
 'F'  'F'   0.0171   0.0103
 'International Tables Vol C Tables 4.2.6.8 and 6.1.1.4'
 
_symmetry_cell_setting            monoclinic
_symmetry_space_group_name_H-M    'P 21'
 
loop_
 _symmetry_equiv_pos_as_xyz
 'x, y, z'
 '-x, y+1/2, -z'
 
_cell_length_a                    12.8117(6)
_cell_length_b                    5.5768(3)
_cell_length_c                    12.9121(6)
_cell_angle_alpha                 90.00
_cell_angle_beta                  103.001(2)
_cell_angle_gamma                 90.00
_cell_volume                      898.90(8)
_cell_formula_units_Z             2
_cell_measurement_temperature     296(2)
_cell_measurement_reflns_used     2802
_cell_measurement_theta_min       3.24
_cell_measurement_theta_max       27.55
 
_exptl_crystal_description        needle	
_exptl_crystal_colour             colourless
_exptl_crystal_size_max           0.50
_exptl_crystal_size_mid           0.25
_exptl_crystal_size_min           0.05
_exptl_crystal_density_meas       ?
_exptl_crystal_density_diffrn     1.365
_exptl_crystal_density_method     'not measured'
_exptl_crystal_F_000              388
_exptl_absorpt_coefficient_mu     0.101
_exptl_absorpt_correction_type    multi-scan
_exptl_absorpt_correction_T_min   0.9511
_exptl_absorpt_correction_T_max   0.9950
_exptl_absorpt_process_details    SADABS
 
_exptl_special_details
;
 ?
;
 
_diffrn_ambient_temperature       296(2)
_diffrn_radiation_wavelength      0.71073
_diffrn_radiation_type            MoK\a
_diffrn_radiation_source          'fine-focus sealed tube'
_diffrn_radiation_monochromator   graphite
_diffrn_measurement_device_type   Bruker
_diffrn_measurement_method        ?
_diffrn_detector_area_resol_mean  ?
_diffrn_standards_number          ?
_diffrn_standards_interval_count  ?
_diffrn_standards_interval_time   ?
_diffrn_standards_decay_%         ?
_diffrn_reflns_number             13888
_diffrn_reflns_av_R_equivalents   0.0579
_diffrn_reflns_av_sigmaI/netI     0.0504
_diffrn_reflns_limit_h_min        -16
_diffrn_reflns_limit_h_max        16
_diffrn_reflns_limit_k_min        -7
_diffrn_reflns_limit_k_max        7
_diffrn_reflns_limit_l_min        -16
_diffrn_reflns_limit_l_max        16
_diffrn_reflns_theta_min          3.24
_diffrn_reflns_theta_max          27.55
_reflns_number_total              4092
_reflns_number_gt                 2802
_reflns_threshold_expression      >2\s(I)
 
_computing_data_collection        ?
_computing_cell_refinement        ?
_computing_data_reduction         ?
_computing_structure_solution     ?
_computing_structure_refinement   'SHELXL-97 (Sheldrick, 2008)'
_computing_molecular_graphics     ?
_computing_publication_material   ?
 
_refine_special_details
;
 Refinement of F^2^ against ALL reflections.  The weighted R-factor wR and
 goodness of fit S are based on F^2^, conventional R-factors R are based
 on F, with F set to zero for negative F^2^. The threshold expression of
 F^2^ > 2\s(F^2^) is used only for calculating R-factors(gt) etc. and is
 not relevant to the choice of reflections for refinement.  R-factors based
 on F^2^ are statistically about twice as large as those based on F, and R-
 factors based on ALL data will be even larger.
;
 
_refine_ls_structure_factor_coef  Fsqd
_refine_ls_matrix_type            full
_refine_ls_weighting_scheme       calc
_refine_ls_weighting_details
 'calc w=1/[\s^2^(Fo^2^)+(0.0313P)^2^+0.1074P] where P=(Fo^2^+2Fc^2^)/3'
_atom_sites_solution_primary      direct
_atom_sites_solution_secondary    difmap
_atom_sites_solution_hydrogens    geom
_refine_ls_hydrogen_treatment     mixed
_refine_ls_extinction_method      none
_refine_ls_extinction_coef        ?
_refine_ls_abs_structure_details
 'Flack H D (1983), Acta Cryst. A39, 876-881'
_refine_ls_abs_structure_Flack    0.4(9)
_refine_ls_number_reflns          4092
_refine_ls_number_parameters      247
_refine_ls_number_restraints      1
_refine_ls_R_factor_all           0.0847
_refine_ls_R_factor_gt            0.0455
_refine_ls_wR_factor_ref          0.0870
_refine_ls_wR_factor_gt           0.0760
_refine_ls_goodness_of_fit_ref    1.052
_refine_ls_restrained_S_all       1.052
_refine_ls_shift/su_max           0.000
_refine_ls_shift/su_mean          0.000
 
loop_
 _atom_site_label
 _atom_site_type_symbol
 _atom_site_fract_x
 _atom_site_fract_y
 _atom_site_fract_z
 _atom_site_U_iso_or_equiv
 _atom_site_adp_type
 _atom_site_occupancy
 _atom_site_symmetry_multiplicity
 _atom_site_calc_flag
 _atom_site_refinement_flags
 _atom_site_disorder_assembly
 _atom_site_disorder_group
F1 F -0.31835(9) 0.4235(3) 0.85424(11) 0.0813(5) Uani 1 1 d . . .
O1 O 0.27679(10) 0.6974(2) 0.68602(10) 0.0469(3) Uani 1 1 d . . .
O2 O 0.41916(13) 0.5579(3) 0.62014(12) 0.0614(4) Uani 1 1 d . . .
O3 O 0.38939(11) 0.2486(2) 0.72645(11) 0.0486(4) Uani 1 1 d . . .
O4 O 0.35593(11) 0.5770(3) 0.95597(10) 0.0575(4) Uani 1 1 d . . .
N1 N 0.10195(11) 0.5272(3) 0.83887(11) 0.0399(4) Uani 1 1 d . . .
C1 C -0.19042(17) 0.6307(4) 0.78701(17) 0.0524(6) Uani 1 1 d . . .
H1 H -0.2443 0.7288 0.7489 0.063 Uiso 1 1 calc R . .
C2 C -0.21404(16) 0.4537(5) 0.84963(17) 0.0546(6) Uani 1 1 d . . .
C3 C -0.13938(18) 0.3012(4) 0.90925(16) 0.0554(6) Uani 1 1 d . . .
H3 H -0.1592 0.1828 0.9518 0.067 Uiso 1 1 calc R . .
C4 C -0.03501(17) 0.3311(4) 0.90335(16) 0.0508(5) Uani 1 1 d . . .
H4 H 0.0173 0.2303 0.9422 0.061 Uiso 1 1 calc R . .
C5 C -0.00555(15) 0.5114(3) 0.83967(14) 0.0407(5) Uani 1 1 d . . .
C6 C 0.13331(14) 0.6919(3) 0.78163(14) 0.0364(4) Uani 1 1 d . . .
C7 C 0.06201(15) 0.8649(3) 0.71870(15) 0.0384(4) Uani 1 1 d . . .
C8 C 0.09888(16) 1.0488(4) 0.66199(15) 0.0460(5) Uani 1 1 d . . .
H8 H 0.1717 1.0620 0.6643 0.055 Uiso 1 1 calc R . .
C9 C 0.02891(18) 1.2091(4) 0.60331(16) 0.0539(5) Uani 1 1 d . . .
H9 H 0.0542 1.3306 0.5661 0.065 Uiso 1 1 calc R . .
C10 C -0.08020(18) 1.1901(4) 0.59938(17) 0.0567(6) Uani 1 1 d . . .
H10 H -0.1278 1.2968 0.5580 0.068 Uiso 1 1 calc R . .
C11 C -0.11789(16) 1.0166(4) 0.65564(16) 0.0518(6) Uani 1 1 d . . .
H11 H -0.1909 1.0085 0.6532 0.062 Uiso 1 1 calc R . .
C12 C -0.04852(15) 0.8498(4) 0.71722(14) 0.0402(5) Uani 1 1 d . . .
C13 C -0.08296(15) 0.6649(4) 0.78008(15) 0.0419(5) Uani 1 1 d . . .
C14 C 0.38953(17) 0.6531(4) 0.70778(17) 0.0488(5) Uani 1 1 d . . .
H14 H 0.4307 0.7977 0.7335 0.059 Uiso 1 1 calc R . .
C15 C 0.40714(15) 0.4588(4) 0.79092(15) 0.0427(5) Uani 1 1 d . . .
H15 H 0.4789 0.4638 0.8377 0.051 Uiso 1 1 calc R . .
C16 C 0.31814(14) 0.4977(3) 0.85054(14) 0.0405(5) Uani 1 1 d . . .
H16 H 0.2744 0.3529 0.8484 0.049 Uiso 1 1 calc R . .
C17 C 0.25242(14) 0.7024(4) 0.78938(14) 0.0391(4) Uani 1 1 d . . .
H17 H 0.2794 0.8537 0.8239 0.047 Uiso 1 1 calc R . .
C18 C 0.41679(17) 0.2991(4) 0.62735(16) 0.0460(5) Uani 1 1 d . . .
C19 C 0.52689(16) 0.2071(4) 0.62591(17) 0.0567(6) Uani 1 1 d . . .
H19A H 0.5782 0.2751 0.6843 0.085 Uiso 1 1 calc R . .
H19B H 0.5448 0.2519 0.5603 0.085 Uiso 1 1 calc R . .
H19C H 0.5279 0.0355 0.6322 0.085 Uiso 1 1 calc R . .
C20 C 0.33182(18) 0.1990(5) 0.53951(17) 0.0654(6) Uani 1 1 d . . .
H20A H 0.3241 0.0304 0.5508 0.098 Uiso 1 1 calc R . .
H20B H 0.3516 0.2235 0.4729 0.098 Uiso 1 1 calc R . .
H20C H 0.2651 0.2786 0.5383 0.098 Uiso 1 1 calc R . .
C21 C 0.3887(3) 0.3872(7) 1.0281(2) 0.0987(11) Uani 1 1 d . . .
H21A H 0.3322 0.2712 1.0206 0.148 Uiso 1 1 calc R . .
H21B H 0.4049 0.4487 1.0994 0.148 Uiso 1 1 calc R . .
H21C H 0.4514 0.3127 1.0135 0.148 Uiso 1 1 calc R . .
 
loop_
 _atom_site_aniso_label
 _atom_site_aniso_U_11
 _atom_site_aniso_U_22
 _atom_site_aniso_U_33
 _atom_site_aniso_U_23
 _atom_site_aniso_U_13
 _atom_site_aniso_U_12
F1 0.0470(7) 0.1154(12) 0.0879(9) -0.0051(10) 0.0282(6) -0.0181(8)
O1 0.0541(9) 0.0436(8) 0.0499(8) 0.0091(7) 0.0262(6) 0.0067(7)
O2 0.0883(11) 0.0403(8) 0.0738(10) 0.0106(8) 0.0567(9) 0.0061(8)
O3 0.0679(10) 0.0347(8) 0.0521(8) 0.0040(7) 0.0322(7) 0.0020(7)
O4 0.0607(9) 0.0694(10) 0.0419(8) -0.0007(8) 0.0103(7) 0.0142(8)
N1 0.0403(9) 0.0420(10) 0.0393(8) -0.0004(8) 0.0127(7) -0.0015(8)
C1 0.0401(12) 0.0673(16) 0.0495(12) -0.0079(12) 0.0095(10) 0.0015(10)
C2 0.0406(12) 0.0762(16) 0.0519(13) -0.0127(14) 0.0203(10) -0.0141(13)
C3 0.0561(14) 0.0659(16) 0.0483(12) -0.0016(12) 0.0200(11) -0.0152(12)
C4 0.0522(13) 0.0564(14) 0.0459(12) 0.0035(11) 0.0155(10) -0.0045(11)
C5 0.0430(11) 0.0461(13) 0.0345(9) -0.0053(10) 0.0121(8) -0.0046(10)
C6 0.0432(11) 0.0334(10) 0.0343(9) -0.0051(9) 0.0121(8) -0.0004(9)
C7 0.0466(11) 0.0347(10) 0.0352(10) -0.0052(9) 0.0118(8) 0.0008(9)
C8 0.0533(12) 0.0404(11) 0.0462(11) -0.0013(11) 0.0154(9) 0.0015(10)
C9 0.0686(15) 0.0427(12) 0.0514(12) 0.0061(11) 0.0153(10) 0.0077(11)
C10 0.0649(16) 0.0496(13) 0.0508(12) 0.0042(12) 0.0029(11) 0.0173(12)
C11 0.0461(12) 0.0561(15) 0.0500(12) -0.0040(11) 0.0045(9) 0.0098(11)
C12 0.0410(11) 0.0438(11) 0.0348(10) -0.0083(9) 0.0060(8) 0.0017(9)
C13 0.0420(11) 0.0464(12) 0.0385(10) -0.0094(10) 0.0117(8) -0.0028(10)
C14 0.0556(14) 0.0365(12) 0.0643(14) 0.0010(10) 0.0345(11) 0.0002(10)
C15 0.0438(11) 0.0351(10) 0.0538(12) -0.0018(10) 0.0209(9) 0.0006(9)
C16 0.0414(11) 0.0405(12) 0.0420(10) 0.0001(9) 0.0146(8) -0.0003(8)
C17 0.0428(11) 0.0359(10) 0.0420(10) -0.0041(10) 0.0170(8) -0.0014(9)
C18 0.0562(13) 0.0400(13) 0.0486(12) 0.0050(10) 0.0262(10) 0.0025(9)
C19 0.0572(14) 0.0572(13) 0.0628(14) -0.0005(12) 0.0284(11) 0.0036(12)
C20 0.0673(15) 0.0751(16) 0.0552(13) 0.0104(14) 0.0164(11) -0.0061(14)
C21 0.122(2) 0.116(3) 0.0568(16) 0.0259(18) 0.0177(15) 0.051(2)
 
_geom_special_details
;
 All s.u.'s (except the s.u. in the dihedral angle between two l.s. planes)
 are estimated using the full covariance matrix.  The cell s.u.'s are taken
 into account individually in the estimation of s.u.'s in distances, angles
 and torsion angles; correlations between s.u.'s in cell parameters are only
 used when they are defined by crystal symmetry.  An approximate (isotropic)
 treatment of cell s.u.'s is used for estimating s.u.'s involving l.s. planes.
;
 
loop_
 _geom_bond_atom_site_label_1
 _geom_bond_atom_site_label_2
 _geom_bond_distance
 _geom_bond_site_symmetry_2
 _geom_bond_publ_flag
F1 C2 1.361(2) . ?
O1 C14 1.429(2) . ?
O1 C17 1.438(2) . ?
O2 C14 1.378(2) . ?
O2 C18 1.447(2) . ?
O3 C15 1.426(2) . ?
O3 C18 1.429(2) . ?
O4 C16 1.409(2) . ?
O4 C21 1.410(3) . ?
N1 C6 1.298(2) . ?
N1 C5 1.382(2) . ?
C1 C2 1.353(3) . ?
C1 C13 1.413(3) . ?
C1 H1 0.9300 . ?
C2 C3 1.378(3) . ?
C3 C4 1.366(3) . ?
C3 H3 0.9300 . ?
C4 C5 1.403(3) . ?
C4 H4 0.9300 . ?
C5 C13 1.402(3) . ?
C6 C7 1.446(3) . ?
C6 C17 1.508(2) . ?
C7 C8 1.402(3) . ?
C7 C12 1.414(3) . ?
C8 C9 1.368(3) . ?
C8 H8 0.9300 . ?
C9 C10 1.391(3) . ?
C9 H9 0.9300 . ?
C10 C11 1.362(3) . ?
C10 H10 0.9300 . ?
C11 C12 1.403(3) . ?
C11 H11 0.9300 . ?
C12 C13 1.441(3) . ?
C14 C15 1.506(3) . ?
C14 H14 0.9800 . ?
C15 C16 1.528(2) . ?
C15 H15 0.9800 . ?
C16 C17 1.529(3) . ?
C16 H16 0.9800 . ?
C17 H17 0.9800 . ?
C18 C20 1.493(3) . ?
C18 C19 1.505(3) . ?
C19 H19A 0.9600 . ?
C19 H19B 0.9600 . ?
C19 H19C 0.9600 . ?
C20 H20A 0.9600 . ?
C20 H20B 0.9600 . ?
C20 H20C 0.9600 . ?
C21 H21A 0.9600 . ?
C21 H21B 0.9600 . ?
C21 H21C 0.9600 . ?
 
loop_
 _geom_angle_atom_site_label_1
 _geom_angle_atom_site_label_2
 _geom_angle_atom_site_label_3
 _geom_angle
 _geom_angle_site_symmetry_1
 _geom_angle_site_symmetry_3
 _geom_angle_publ_flag
C14 O1 C17 104.00(14) . . ?
C14 O2 C18 108.53(15) . . ?
C15 O3 C18 108.76(14) . . ?
C16 O4 C21 112.9(2) . . ?
C6 N1 C5 119.08(16) . . ?
C2 C1 C13 119.2(2) . . ?
C2 C1 H1 120.4 . . ?
C13 C1 H1 120.4 . . ?
C1 C2 F1 118.0(2) . . ?
C1 C2 C3 124.31(18) . . ?
F1 C2 C3 117.7(2) . . ?
C4 C3 C2 117.3(2) . . ?
C4 C3 H3 121.3 . . ?
C2 C3 H3 121.3 . . ?
C3 C4 C5 121.0(2) . . ?
C3 C4 H4 119.5 . . ?
C5 C4 H4 119.5 . . ?
N1 C5 C13 122.67(17) . . ?
N1 C5 C4 116.74(18) . . ?
C13 C5 C4 120.59(17) . . ?
N1 C6 C7 123.68(17) . . ?
N1 C6 C17 115.34(16) . . ?
C7 C6 C17 120.89(17) . . ?
C8 C7 C12 119.37(17) . . ?
C8 C7 C6 122.46(17) . . ?
C12 C7 C6 118.15(17) . . ?
C9 C8 C7 120.75(19) . . ?
C9 C8 H8 119.6 . . ?
C7 C8 H8 119.6 . . ?
C8 C9 C10 119.9(2) . . ?
C8 C9 H9 120.1 . . ?
C10 C9 H9 120.1 . . ?
C11 C10 C9 120.6(2) . . ?
C11 C10 H10 119.7 . . ?
C9 C10 H10 119.7 . . ?
C10 C11 C12 121.19(19) . . ?
C10 C11 H11 119.4 . . ?
C12 C11 H11 119.4 . . ?
C11 C12 C7 118.20(18) . . ?
C11 C12 C13 123.93(17) . . ?
C7 C12 C13 117.87(17) . . ?
C5 C13 C1 117.52(19) . . ?
C5 C13 C12 118.53(17) . . ?
C1 C13 C12 123.94(19) . . ?
O2 C14 O1 110.97(18) . . ?
O2 C14 C15 106.45(16) . . ?
O1 C14 C15 104.30(15) . . ?
O2 C14 H14 111.6 . . ?
O1 C14 H14 111.6 . . ?
C15 C14 H14 111.6 . . ?
O3 C15 C14 101.35(15) . . ?
O3 C15 C16 111.84(15) . . ?
C14 C15 C16 104.34(15) . . ?
O3 C15 H15 112.8 . . ?
C14 C15 H15 112.8 . . ?
C16 C15 H15 112.8 . . ?
O4 C16 C15 113.46(15) . . ?
O4 C16 C17 107.12(15) . . ?
C15 C16 C17 103.46(14) . . ?
O4 C16 H16 110.8 . . ?
C15 C16 H16 110.8 . . ?
C17 C16 H16 110.8 . . ?
O1 C17 C6 111.44(14) . . ?
O1 C17 C16 104.80(14) . . ?
C6 C17 C16 115.91(16) . . ?
O1 C17 H17 108.1 . . ?
C6 C17 H17 108.1 . . ?
C16 C17 H17 108.1 . . ?
O3 C18 O2 105.50(15) . . ?
O3 C18 C20 108.82(17) . . ?
O2 C18 C20 110.3(2) . . ?
O3 C18 C19 111.32(16) . . ?
O2 C18 C19 107.82(18) . . ?
C20 C18 C19 112.85(19) . . ?
C18 C19 H19A 109.5 . . ?
C18 C19 H19B 109.5 . . ?
H19A C19 H19B 109.5 . . ?
C18 C19 H19C 109.5 . . ?
H19A C19 H19C 109.5 . . ?
H19B C19 H19C 109.5 . . ?
C18 C20 H20A 109.5 . . ?
C18 C20 H20B 109.5 . . ?
H20A C20 H20B 109.5 . . ?
C18 C20 H20C 109.5 . . ?
H20A C20 H20C 109.5 . . ?
H20B C20 H20C 109.5 . . ?
O4 C21 H21A 109.5 . . ?
O4 C21 H21B 109.5 . . ?
H21A C21 H21B 109.5 . . ?
O4 C21 H21C 109.5 . . ?
H21A C21 H21C 109.5 . . ?
H21B C21 H21C 109.5 . . ?
 
loop_
 _geom_torsion_atom_site_label_1
 _geom_torsion_atom_site_label_2
 _geom_torsion_atom_site_label_3
 _geom_torsion_atom_site_label_4
 _geom_torsion
 _geom_torsion_site_symmetry_1
 _geom_torsion_site_symmetry_2
 _geom_torsion_site_symmetry_3
 _geom_torsion_site_symmetry_4
 _geom_torsion_publ_flag
C13 C1 C2 F1 -179.53(18) . . . . ?
C13 C1 C2 C3 0.5(3) . . . . ?
C1 C2 C3 C4 -0.6(3) . . . . ?
F1 C2 C3 C4 179.35(19) . . . . ?
C2 C3 C4 C5 0.5(3) . . . . ?
C6 N1 C5 C13 0.7(3) . . . . ?
C6 N1 C5 C4 -179.63(17) . . . . ?
C3 C4 C5 N1 -179.96(18) . . . . ?
C3 C4 C5 C13 -0.3(3) . . . . ?
C5 N1 C6 C7 0.9(2) . . . . ?
C5 N1 C6 C17 177.46(16) . . . . ?
N1 C6 C7 C8 176.57(17) . . . . ?
C17 C6 C7 C8 0.2(3) . . . . ?
N1 C6 C7 C12 -1.7(3) . . . . ?
C17 C6 C7 C12 -178.13(17) . . . . ?
C12 C7 C8 C9 -1.7(3) . . . . ?
C6 C7 C8 C9 180.00(17) . . . . ?
C7 C8 C9 C10 -0.1(3) . . . . ?
C8 C9 C10 C11 1.6(3) . . . . ?
C9 C10 C11 C12 -1.3(3) . . . . ?
C10 C11 C12 C7 -0.6(3) . . . . ?
C10 C11 C12 C13 178.79(19) . . . . ?
C8 C7 C12 C11 2.0(3) . . . . ?
C6 C7 C12 C11 -179.60(16) . . . . ?
C8 C7 C12 C13 -177.36(16) . . . . ?
C6 C7 C12 C13 1.0(2) . . . . ?
N1 C5 C13 C1 179.75(17) . . . . ?
C4 C5 C13 C1 0.1(3) . . . . ?
N1 C5 C13 C12 -1.3(3) . . . . ?
C4 C5 C13 C12 179.01(18) . . . . ?
C2 C1 C13 C5 -0.2(3) . . . . ?
C2 C1 C13 C12 -179.04(19) . . . . ?
C11 C12 C13 C5 -178.96(17) . . . . ?
C7 C12 C13 C5 0.4(3) . . . . ?
C11 C12 C13 C1 -0.1(3) . . . . ?
C7 C12 C13 C1 179.27(18) . . . . ?
C18 O2 C14 O1 -92.3(2) . . . . ?
C18 O2 C14 C15 20.5(2) . . . . ?
C17 O1 C14 O2 158.09(16) . . . . ?
C17 O1 C14 C15 43.85(19) . . . . ?
C18 O3 C15 C14 28.52(18) . . . . ?
C18 O3 C15 C16 139.16(16) . . . . ?
O2 C14 C15 O3 -29.99(19) . . . . ?
O1 C14 C15 O3 87.42(16) . . . . ?
O2 C14 C15 C16 -146.27(17) . . . . ?
O1 C14 C15 C16 -28.87(19) . . . . ?
C21 O4 C16 C15 -85.0(2) . . . . ?
C21 O4 C16 C17 161.52(19) . . . . ?
O3 C15 C16 O4 139.61(16) . . . . ?
C14 C15 C16 O4 -111.65(19) . . . . ?
O3 C15 C16 C17 -104.68(16) . . . . ?
C14 C15 C16 C17 4.06(19) . . . . ?
C14 O1 C17 C6 -167.20(16) . . . . ?
C14 O1 C17 C16 -41.10(18) . . . . ?
N1 C6 C17 O1 127.99(17) . . . . ?
C7 C6 C17 O1 -55.3(2) . . . . ?
N1 C6 C17 C16 8.3(2) . . . . ?
C7 C6 C17 C16 -175.05(15) . . . . ?
O4 C16 C17 O1 142.03(14) . . . . ?
C15 C16 C17 O1 21.90(18) . . . . ?
O4 C16 C17 C6 -94.69(18) . . . . ?
C15 C16 C17 C6 145.18(16) . . . . ?
C15 O3 C18 O2 -17.3(2) . . . . ?
C15 O3 C18 C20 -135.63(19) . . . . ?
C15 O3 C18 C19 99.38(19) . . . . ?
C14 O2 C18 O3 -2.8(2) . . . . ?
C14 O2 C18 C20 114.54(19) . . . . ?
C14 O2 C18 C19 -121.85(18) . . . . ?
 
_diffrn_measured_fraction_theta_max    0.998
_diffrn_reflns_theta_full              27.55
_diffrn_measured_fraction_theta_full   0.998
_refine_diff_density_max    0.144
_refine_diff_density_min   -0.183
_refine_diff_density_rms    0.038
